# Supplementary material for: A series of novel Cu-based MOFs: syntheses, structural diversity, catalytic properties and mimic peroxidase activity for colorimetric detection of H2O2
Source: Royal Society of Chemistry journal article supplement (doi:10.1039/d2nj01981g), 2022-01-01
Supplement: d2nj01981g1.pdf [file d2nj01981g1.pdf]

## ***Supporting Information***

# **A series of novel Cu-based MOFs: syntheses, structural diversity, catalytic properties and mimic peroxidase activity for colorimetric detection of H<sub>2</sub>O<sub>2</sub>**

Juan Chai,<sup>‡a</sup> Luohao Yuan,<sup>‡ac</sup> Shiwei Wang,<sup>a</sup> Tong Li,<sup>a</sup> Mingxue Wu,<sup>b</sup> Zhiwei Huang,<sup>a</sup> Hongfeng Yin<sup>\*a</sup>

<sup>a</sup>Ningbo Institute of Materials Technology and Engineering, Chinese Academy of Sciences, 1219 Zhongguan West Road, Ningbo, Zhejiang 315201, P. R. China

E-mail: yinhf@nimte.ac.cn

<sup>b</sup>School of Chemistry and Chemical Engineering, Qingdao University, Qingdao 266071, Shandong, P. R. China

<sup>c</sup>Institute of Industrial Catalysis, College of Chemical Engineering, State Key Laboratory Breeding Base of Green-Chemical Synthesis Technology, Zhejiang University of Technology, Hangzhou, 310032, China.

## Supporting Information

### Table of Contents

---

|                                                                                                                                                                                                                                                                                                                                                |     |
|------------------------------------------------------------------------------------------------------------------------------------------------------------------------------------------------------------------------------------------------------------------------------------------------------------------------------------------------|-----|
| 1. Powder X-ray diffraction patterns of MOF 1. (Fig. S1)                                                                                                                                                                                                                                                                                       | S5  |
| 2. Powder X-ray diffraction patterns of MOF 2. (Fig. S2)                                                                                                                                                                                                                                                                                       | S5  |
| 3. Powder X-ray diffraction patterns of MOF 3. (Fig. S3)                                                                                                                                                                                                                                                                                       | S6  |
| 4. FT-IR spectra of MOF 1 (a), MOF 2 (b) and MOF 3 (c). (Fig. S4)                                                                                                                                                                                                                                                                              | S6  |
| 5. SEM images of MOF 1 (a), MOF 2 (b) and MOF 3 (c). (Fig. S5)                                                                                                                                                                                                                                                                                 | S7  |
| 6. TGA curves of MOFs 1-3 measured in air atmosphere. (Fig. S6)                                                                                                                                                                                                                                                                                | S7  |
| 7. Relative peroxidase activity of MOFs 1-3 at different temperatures (a),<br>pH values (b) and concentration of MOFs (c). (Fig. S7)                                                                                                                                                                                                           | S8  |
| 8. UV-vis absorbance spectra at different pH values for 1 (a), 2 (b), 3 (c).<br>(Fig. S8)                                                                                                                                                                                                                                                      | S9  |
| 9. UV-vis absorbance spectra at different temperature for 1 (a), 2 (b), 3 (c).<br>(Fig. S9)                                                                                                                                                                                                                                                    | S9  |
| 10. UV-vis absorbance spectra at different concentrations of MOFs for 1<br>(a), 2 (b), 3 (c). (Fig. S10)                                                                                                                                                                                                                                       | S9  |
| 11. Kinetic data obtained by varying H <sub>2</sub> O <sub>2</sub> concentrations while keeping<br>the concentration of ABTS constant (0.5 mmol L <sup>-1</sup> ), for 1 (a), for 2 (c), for<br>3 (e) and the Lineweaver-Burk plots of the double reciprocal of the<br>Michaelis-Menten equation for 1 (b), for 2 (d), for 3 (f). (Fig. S11)   | S10 |
| 12. Kinetic data obtained by varying ABTS concentrations while keeping<br>the concentration of H <sub>2</sub> O <sub>2</sub> constant (0.5 mmol L <sup>-1</sup> ) for 1 (a), for 2 (c), for 3<br>(e) and the Lineweaver-Burk plots of the double reciprocal of the<br>Michaelis-Menten equation for 1 (b), for 2 (d) and for 3 (f). (Fig. S12) | S11 |
| 13. UV-vis absorbance spectra of kinetic data obtained by varying H <sub>2</sub> O <sub>2</sub><br>concentrations while keeping the concentration of ABTS constant (0.5<br>mmol L <sup>-1</sup> ), for 1 (a), for 2 (b), for 3 (c). (Fig. S12)                                                                                                 | S12 |

---

- 
- 14.** UV-vis absorbance spectra of kinetic data obtained by varying ABTS concentrations while keeping the concentration of H<sub>2</sub>O<sub>2</sub> constant (0.5 mmol L<sup>-1</sup>), for **1** (a), for **2** (b), for **3** (c). (Fig. S14) S12
- 15.** The corresponding linear calibration plots for H<sub>2</sub>O<sub>2</sub> detection of **1** with linear ranges of 0.5 to 200 μM (a), 200 to 500 μM (b). (Fig. S15) S13
- 16.** (a) UV-vis absorbance spectra of ABTS for **2** at varying H<sub>2</sub>O<sub>2</sub> concentrations (0.5, 1, 2, 5, 10, 20, 50, 75, 100, 150, 200, 300, 400, 500 μM). (b) The corresponding linear calibration plots for H<sub>2</sub>O<sub>2</sub> detection. (Fig. S16) S14
- 17.** The corresponding linear calibration plots for H<sub>2</sub>O<sub>2</sub> detection of **2** with linear ranges of 0.5 to 100 μM (a), 100 to 500 μM (b). (Fig. S17) S14
- 18.** (a) UV-vis absorbance spectra of ABTS for **3** at varying H<sub>2</sub>O<sub>2</sub> concentrations (0.5, 1, 2, 5, 10, 20, 50, 75, 100, 150, 200, 300, 400, 500 μM). (b) The corresponding linear calibration plots for H<sub>2</sub>O<sub>2</sub> detection. (Fig. S18) S15
- 19.** The corresponding linear calibration plots for H<sub>2</sub>O<sub>2</sub> detection of **3** with linear ranges of 0.5 to 100 μM (a), 100 to 500 μM (b). (Fig. S19) S15
- 20.** Investigation the effect of different system on hydroxyl radical generation when terephthalic acid was used as a fluorescent probe. (Fig. S20) S16
- 21.** Relative peroxidase activity of MOFs **1-3** after recycling six times. (Fig. S21) S16
- 22.** Photographs of selectivity of MOFs **1-3** for H<sub>2</sub>O<sub>2</sub>. From left to right: isopropyl alcohol (IPA), ethanol (EA), acetone(AC), tetrahydrofuran (THF), ethyl acetate (EAC), DMF, NaCl, KCl, aspartic acid (Asp), glucose (Glu), ascorbic acid (AA), citric acid (CA), salicylic acid (SA) and H<sub>2</sub>O<sub>2</sub>. (Fig. S22) S17
- 23.** The XPS spectra of MOFs **1-3**. (Fig. S23) S17
-

---

|                                                                                                                           |         |
|---------------------------------------------------------------------------------------------------------------------------|---------|
| <b>24.</b> Crystal and structure refinement data for MOFs <b>1-3</b> . (Table S1)                                         | S18     |
| <b>25.</b> Selected bond lengths [Å] and angles [°] for MOFs <b>1-3</b> . (Table S2)                                      | S19-S21 |
| <b>26.</b> Table S3 Mild oxidation of cycloalkanes (C6 and C8) in the presence of catalysts 1-3 <sup>a</sup> . (Table S3) | S22     |
| <b>27.</b> The ORTEP diagrams of MOF <b>1</b> (a), <b>2</b> (b), <b>3</b> (c) (probability level 50%). (Fig. S24)         | S23     |

---

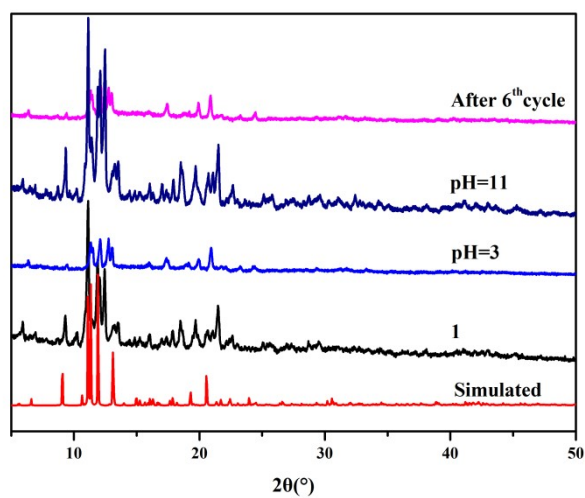

Fig. S1 Powder X-ray diffraction patterns of MOF 1.

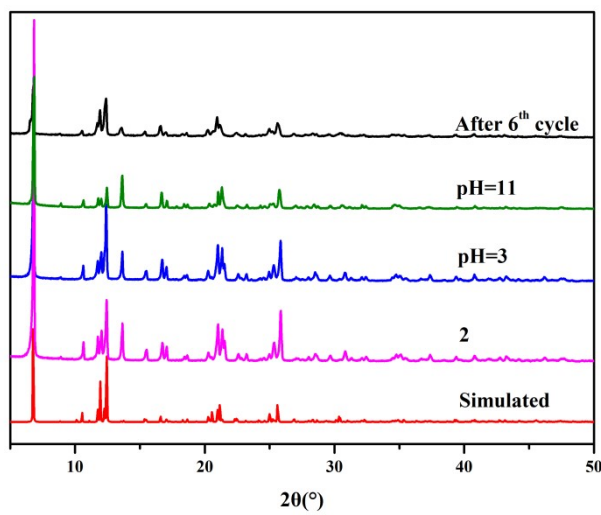

Fig. S2 Powder X-ray diffraction patterns of MOF 2.

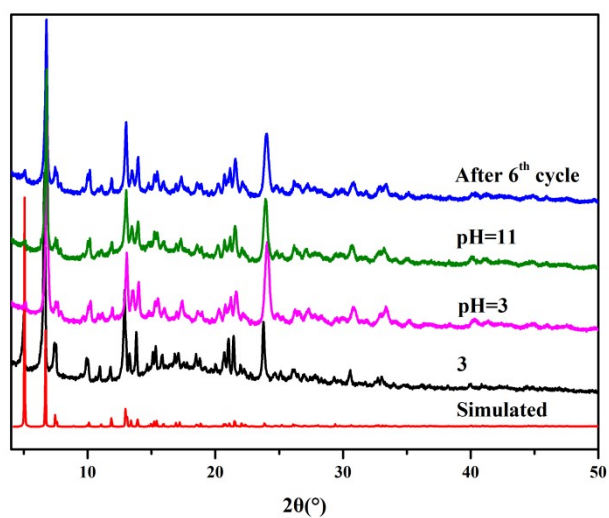

**Fig. S3** Powder X-ray diffraction patterns of MOF 3.

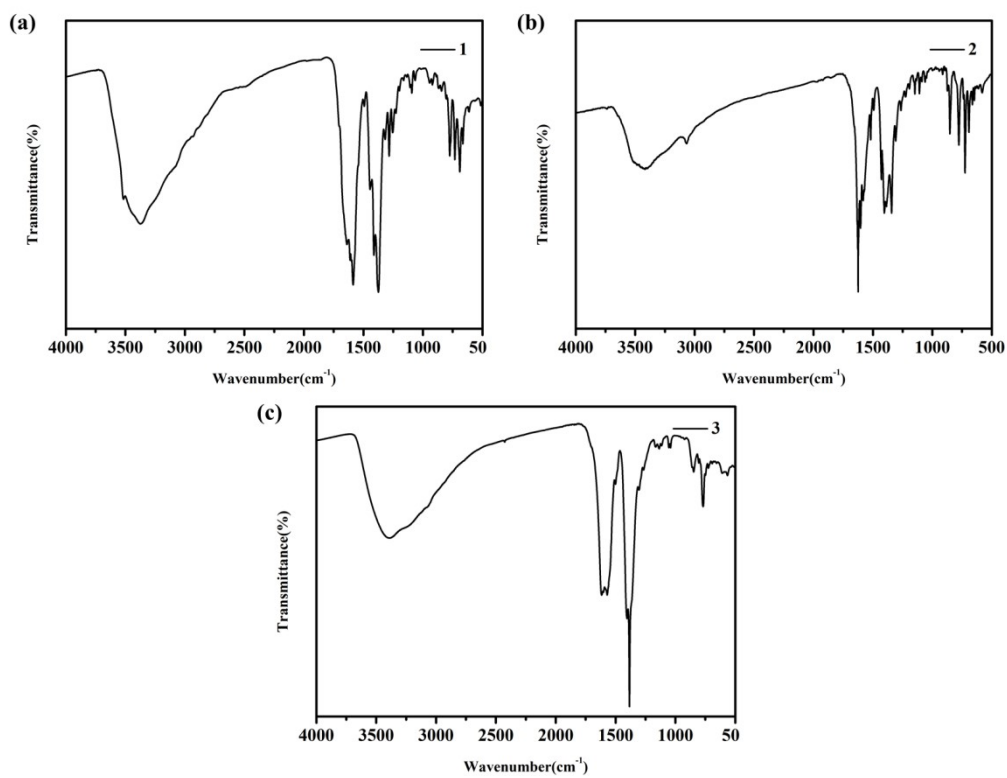

**Fig. S4** FT-IR spectra of MOF 1 (a), MOF 2 (b) and MOF 3 (c).

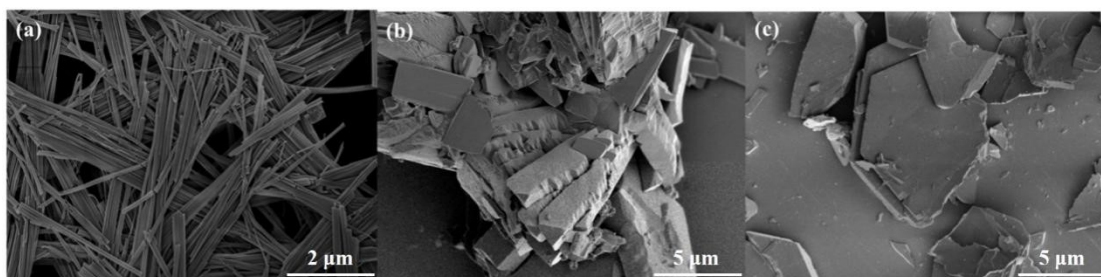

**Fig. S5** SEM images of MOF 1 (a), MOF 2 (b) and MOF 3 (c).

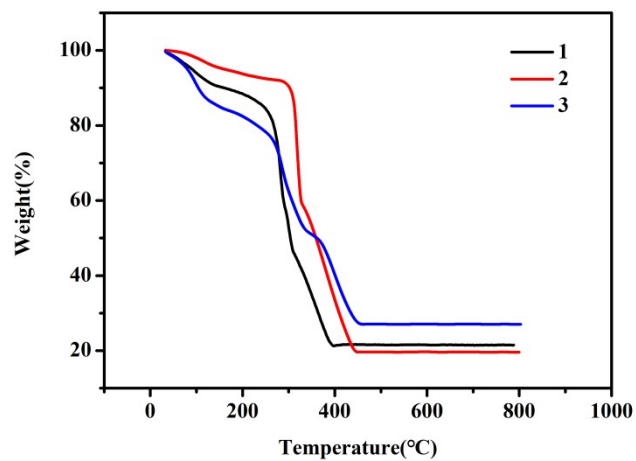

**Fig. S6** TGA curves of MOFs 1-3 measured in air atmosphere.

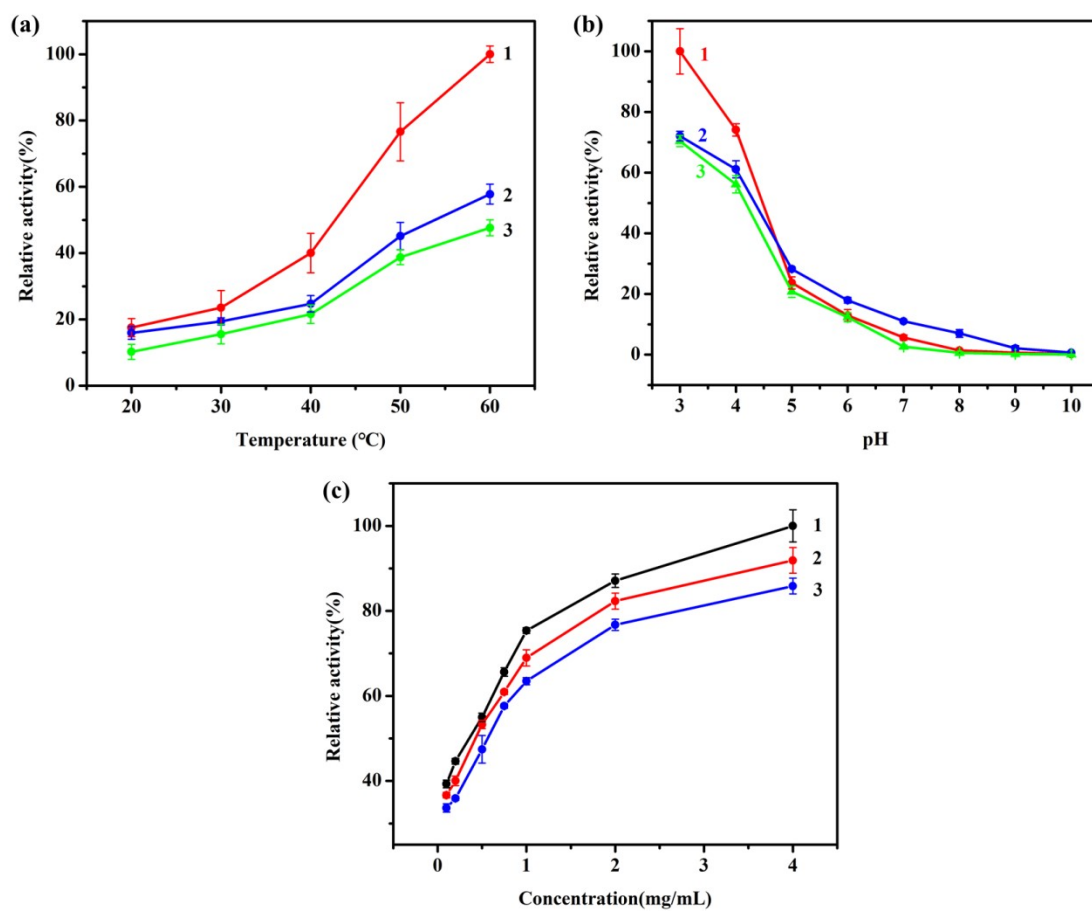

**Fig. S7** Relative peroxidase activity of MOFs **1-3** at different temperatures (a), pH values (b) and concentrations of MOFs (c).



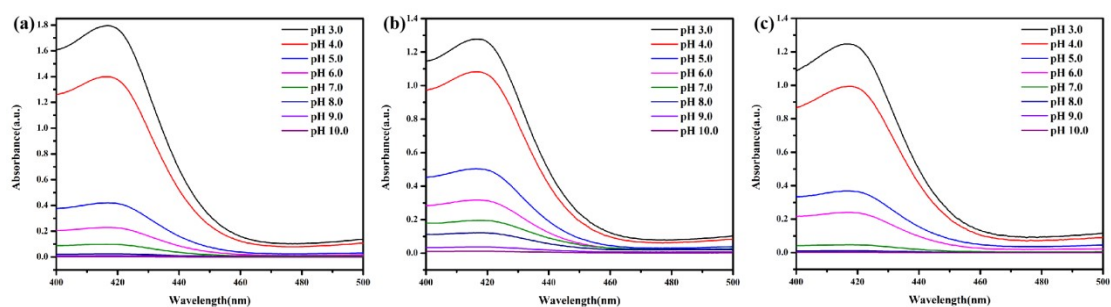

**Fig. S8** UV-vis absorbance spectra at different pH values for **1** (a), **2** (b), **3** (c).

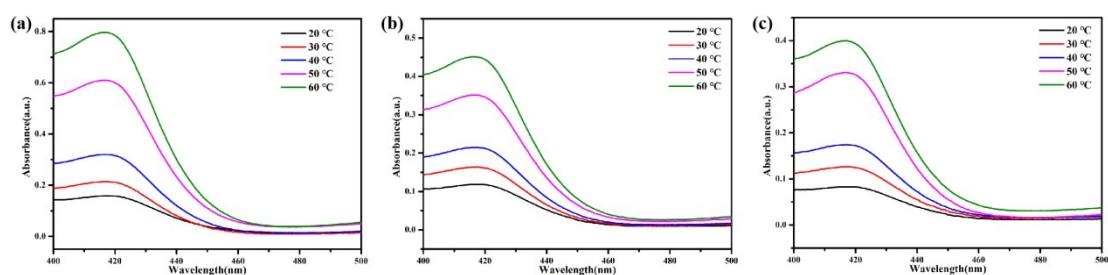

**Fig. S9** UV-vis absorbance spectra at different temperature for **1** (a), **2** (b), **3** (c).

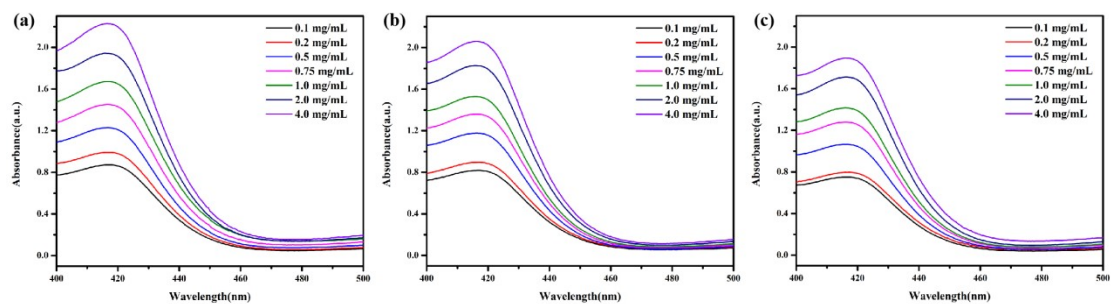

**Fig. S10** UV-vis absorbance spectra at different concentrations of MOFs for **1** (a), **2** (b), **3** (c).

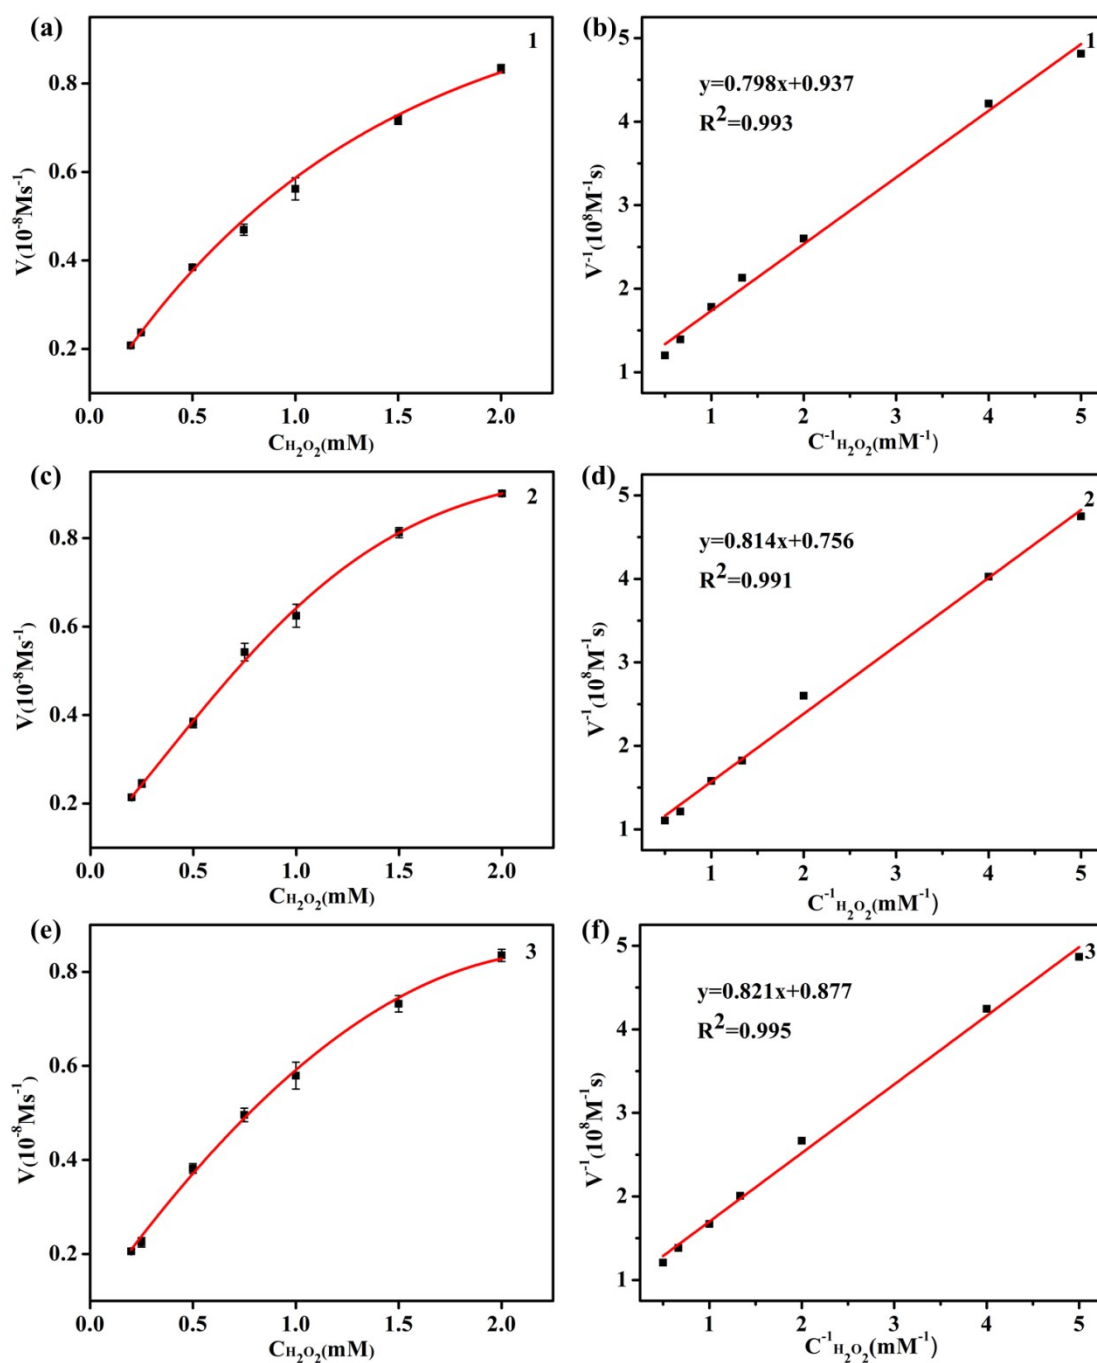

**Fig. S11** Kinetic data obtained by varying  $\text{H}_2\text{O}_2$  concentrations while keeping the concentration of ABTS constant ( $0.5 \text{ mmol L}^{-1}$ ), for **1** (a), for **2** (c), for **3** (e) and the Lineweaver-Burk plots of the double reciprocal of the Michaelis-Menten equation for **1** (b), for **2** (d), for **3** (f).

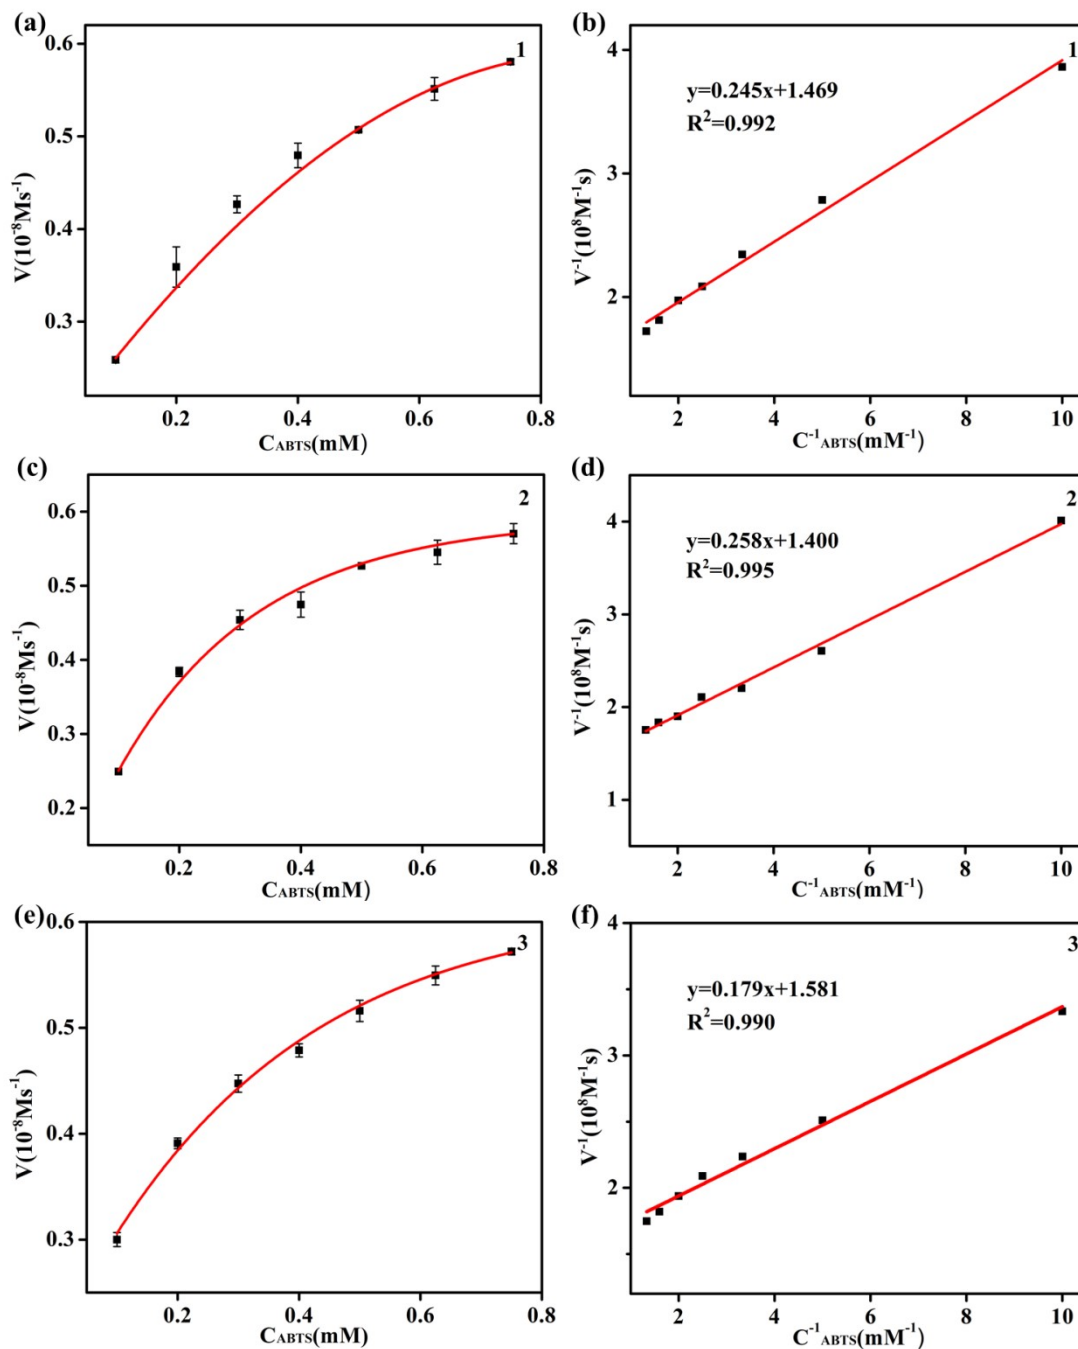

**Fig. S12** Kinetic data obtained by varying ABTS concentrations while keeping the concentration of  $\text{H}_2\text{O}_2$  constant ( $0.5 \text{ mmol L}^{-1}$ ) for **1** (a), for **2** (c), for **3** (e) and the Lineweaver-Burk plots of the double reciprocal of the Michaelis-Menten equation for **1** (b), for **2** (d) and for **3** (f).

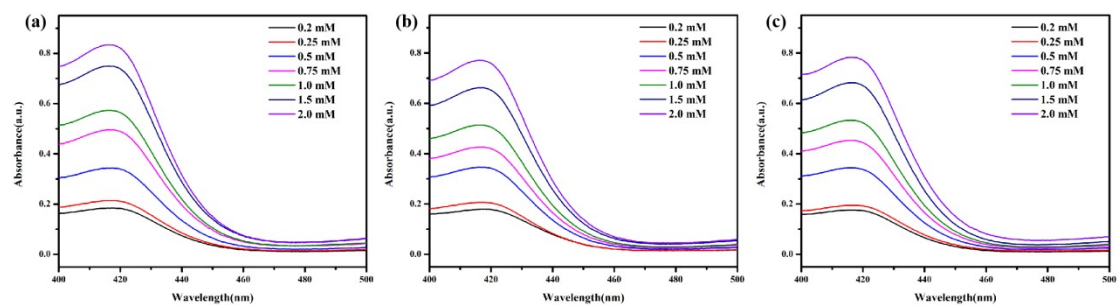

**Fig. S13** UV-vis absorbance spectra of kinetic data obtained by varying H<sub>2</sub>O<sub>2</sub> concentrations while keeping the concentration of ABTS constant (0.5 mmol L<sup>-1</sup>), for **1** (a), for **2** (b), for **3** (c).

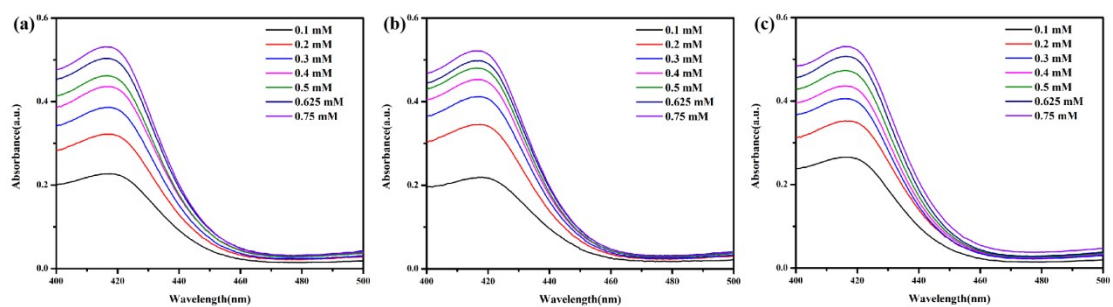

**Fig. S14** UV-vis absorbance spectra of kinetic data obtained by varying ABTS concentrations while keeping the concentration of H<sub>2</sub>O<sub>2</sub> constant (0.5 mmol L<sup>-1</sup>), for **1** (a), for **2** (b), for **3** (c).

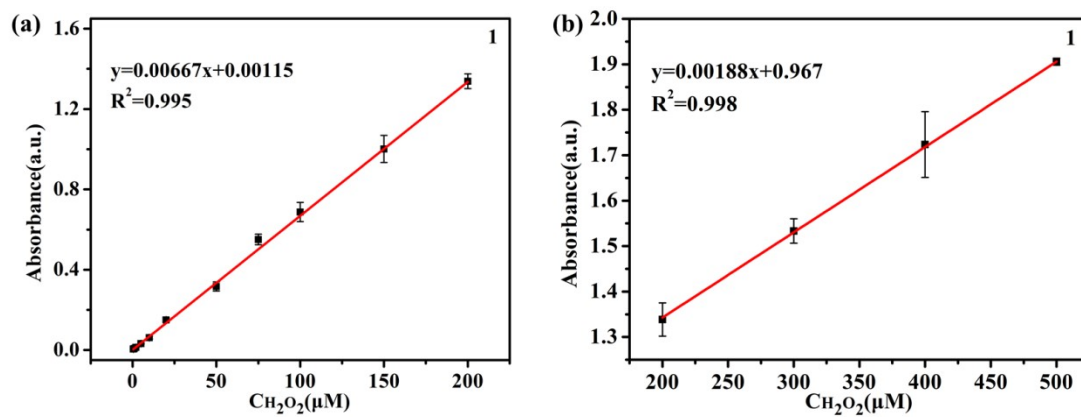

**Fig. S15** The corresponding linear calibration plots for  $\text{H}_2\text{O}_2$  detection of **1** with linear ranges of 0.5 to 200  $\mu\text{M}$  (a), 200 to 500  $\mu\text{M}$  (b).

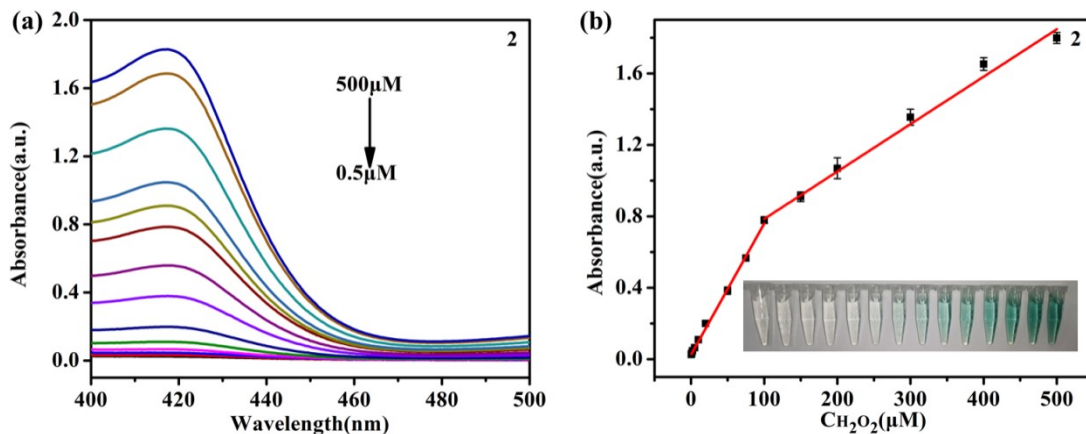

**Fig. S16** (a) UV-vis absorbance spectra of ABTS for **2** at varying  $\text{H}_2\text{O}_2$  concentrations (0.5, 1, 2, 5, 10, 20, 50, 75, 100, 150, 200, 300, 400, 500  $\mu\text{M}$ ). (b) The corresponding linear calibration plots for  $\text{H}_2\text{O}_2$  detection.

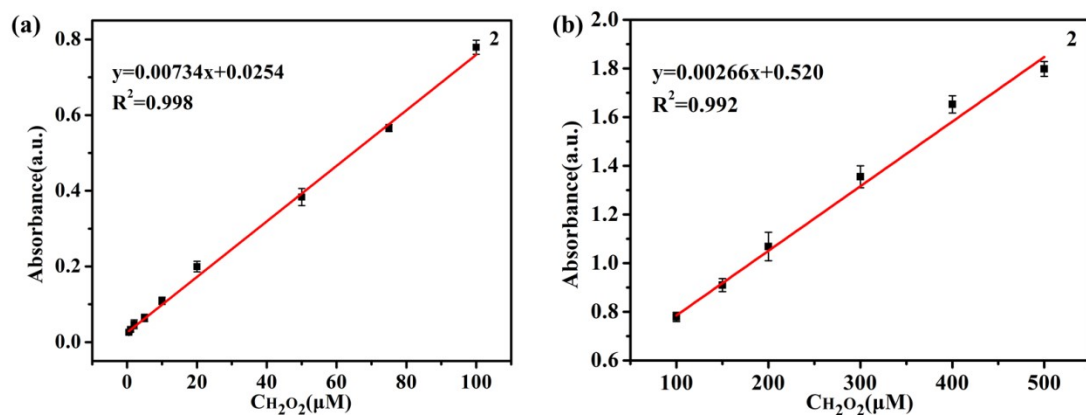

**Fig. S17** The corresponding linear calibration plots for  $\text{H}_2\text{O}_2$  detection of **2** with linear ranges of 0.5 to 100  $\mu\text{M}$  (a), 100 to 500  $\mu\text{M}$  (b).

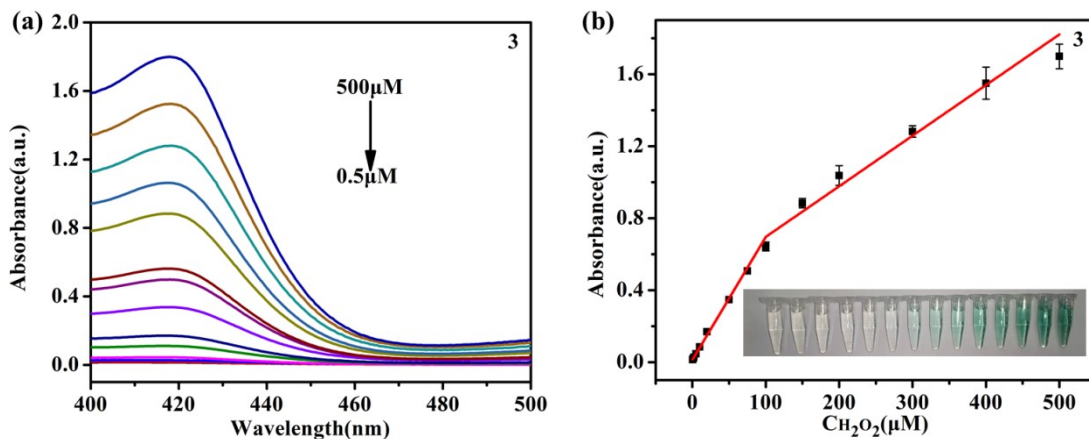

**Fig. S18** (a) UV-vis absorbance spectra of ABTS for **3** at varying  $\text{H}_2\text{O}_2$  concentrations (0.5, 1, 2, 5, 10, 20, 50, 75, 100, 150, 200, 300, 400, 500  $\mu\text{M}$ ). (b) The corresponding linear calibration plots for  $\text{H}_2\text{O}_2$  detection.

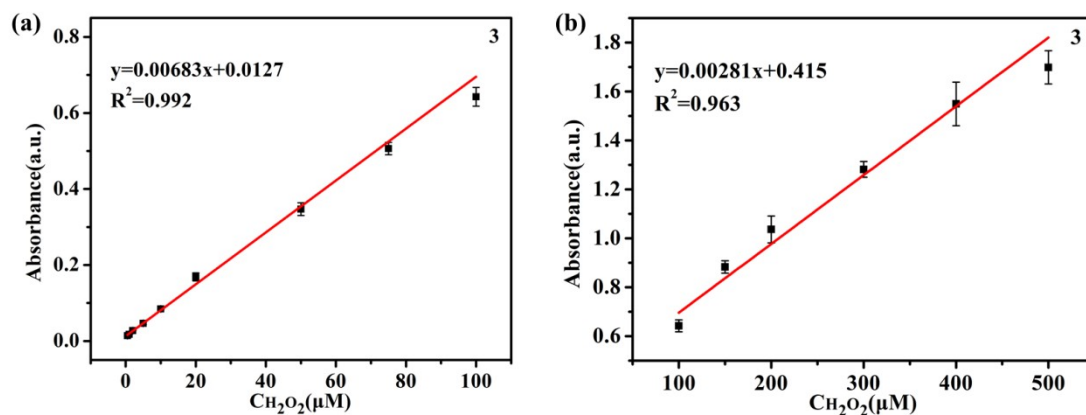

**Fig. S19** The corresponding linear calibration plots for  $\text{H}_2\text{O}_2$  detection of **3** with linear ranges of 0.5 to 100  $\mu\text{M}$  (a), 100 to 500  $\mu\text{M}$  (b).

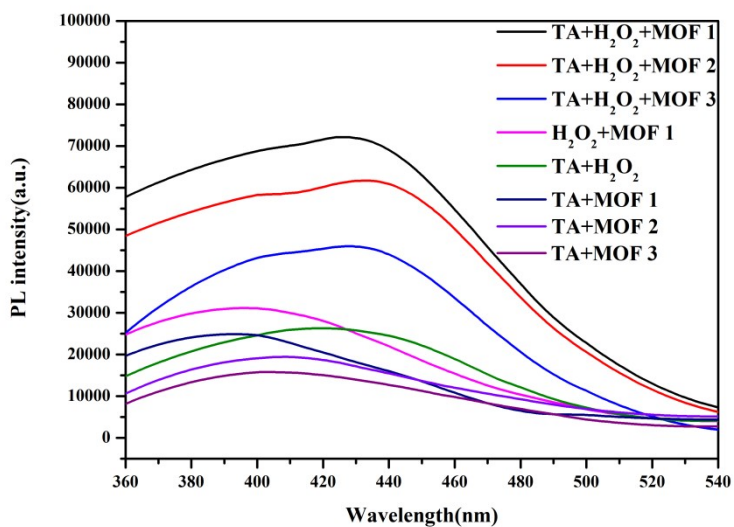

**Fig. S20** Investigation the effect of different system on hydroxyl radical generation when terephthalic acid was used as a fluorescent probe.

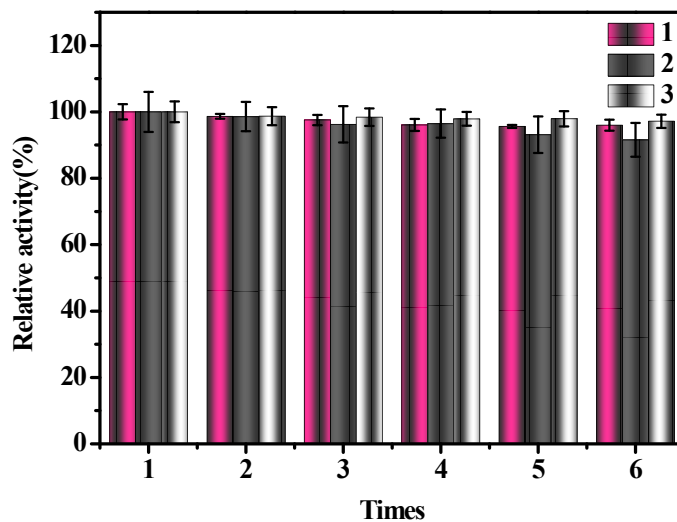

**Fig. S21** Relative peroxidase activity of MOFs 1-3 after recycling six times.



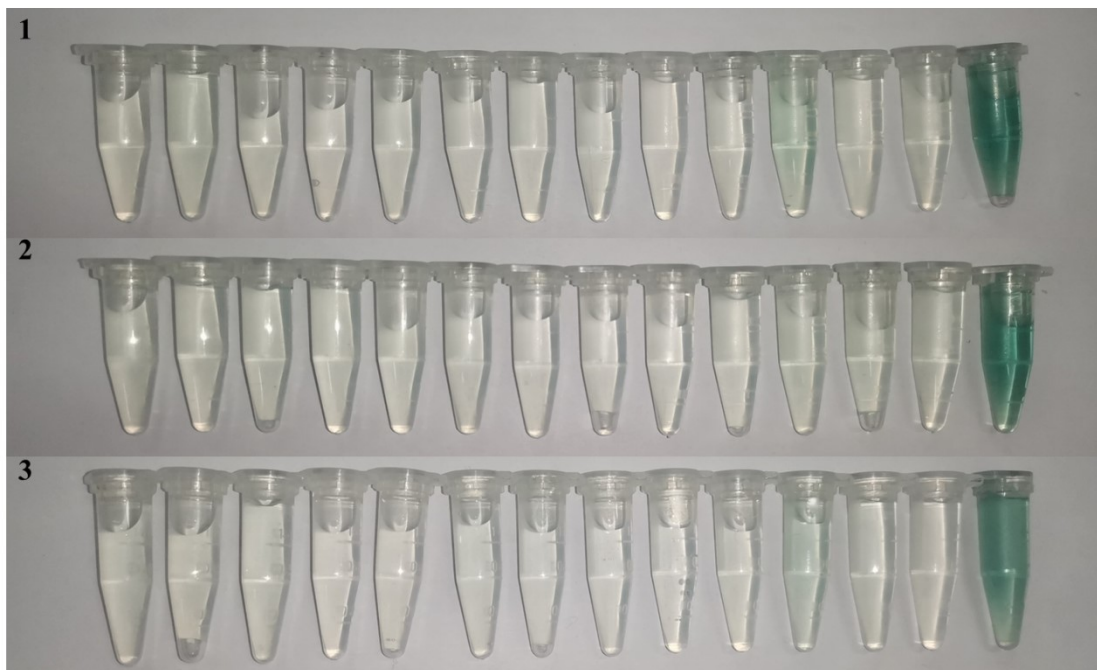

**Fig. S22** Photographs of selectivity of MOFs **1-3** for  $\text{H}_2\text{O}_2$ . From left to right: isopropyl alcohol (IPA), ethanol (EA), acetone(AC), tetrahydrofuran (THF), ethyl acetate (EAC), DMF, NaCl, KCl, aspartic acid (Asp), glucose (Glu), ascorbic acid (AA), citric acid (CA), salicylic acid (SA) and  $\text{H}_2\text{O}_2$ .

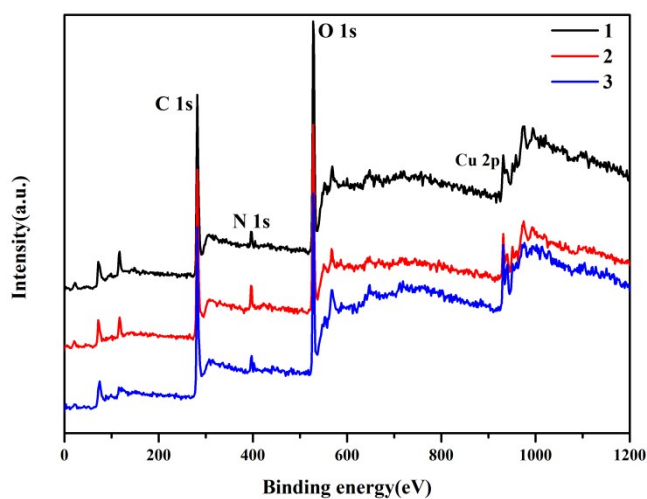

**Fig. S23** The XPS spectra of MOFs **1-3**.

**Table S1 Crystal and structure refinement data for MOFs 1-3**

| MOFs                                         | 1                                                                              | 2                                                                              | 3                                                                              |
|----------------------------------------------|--------------------------------------------------------------------------------|--------------------------------------------------------------------------------|--------------------------------------------------------------------------------|
| chemical formula                             | C <sub>59</sub> H <sub>45</sub> Cu <sub>6</sub> N <sub>5</sub> O <sub>32</sub> | C <sub>52</sub> H <sub>30</sub> Cu <sub>3</sub> N <sub>6</sub> O <sub>13</sub> | C <sub>56</sub> H <sub>42</sub> Cu <sub>8</sub> N <sub>5</sub> O <sub>38</sub> |
| fw                                           | 1717.24                                                                        | 1137.44                                                                        | 1901.334                                                                       |
| cryst system                                 | triclinic                                                                      | triclinic                                                                      | monoclinic                                                                     |
| space group                                  | <i>P</i> -1                                                                    | <i>P</i> -1                                                                    | <i>C</i> 2/ <i>c</i>                                                           |
| a/Å                                          | 8.4291(15)                                                                     | 9.2608(3)                                                                      | 27.4616(7)                                                                     |
| b/Å                                          | 16.414(3)                                                                      | 10.6337(4)                                                                     | 23.3296(6)                                                                     |
| c/Å                                          | 16.973(3)                                                                      | 13.1879(5)                                                                     | 14.1872(4)                                                                     |
| α/deg                                        | 72.135(7)                                                                      | 82.385(1)                                                                      | 90                                                                             |
| β/deg                                        | 80.514(7)                                                                      | 85.159(1)                                                                      | 105.775(1)                                                                     |
| γ/deg                                        | 89.314(9)                                                                      | 70.816(1)                                                                      | 90                                                                             |
| <i>V</i> / Å <sup>3</sup>                    | 2202.7(7)                                                                      | 1214.6(1)                                                                      | 8747.0(4)                                                                      |
| T/K                                          | 170                                                                            | 296                                                                            | 289                                                                            |
| Z                                            | 1                                                                              | 1                                                                              | 4                                                                              |
| D <sub>c</sub> /g cm <sup>-3</sup>           | 1.295                                                                          | 1.655                                                                          | 1.711                                                                          |
| μ/mm <sup>-1</sup>                           | 1.495                                                                          | 1.372                                                                          | 3.073                                                                          |
| F(000)                                       | 864.0                                                                          | 615.0                                                                          | 4576                                                                           |
| index ranges                                 | -10≤h≤10                                                                       | -12≤h≤12                                                                       | -33≤h≤33                                                                       |
|                                              | -21≤k≤21                                                                       | -13≤k≤13                                                                       | -28≤k≤28                                                                       |
|                                              | -22≤l≤21                                                                       | -17≤l≤17                                                                       | -16≤l≤17                                                                       |
| R <sub>int</sub>                             | 0.1044                                                                         | 0.0707                                                                         | 0.0502                                                                         |
| GOF on <i>F</i> <sup>2</sup>                 | 1.081                                                                          | 1.039                                                                          | 1.054                                                                          |
| R <sub>1</sub> [ <i>I</i> > 2σ( <i>I</i> )]  | 0.0499                                                                         | 0.0367                                                                         | 0.0377                                                                         |
| wR <sub>2</sub> [ <i>I</i> > 2σ( <i>I</i> )] | 0.1451                                                                         | 0.1008                                                                         | 0.1058                                                                         |
| CCDC No.                                     | 2129142                                                                        | 2129147                                                                        | 2129156                                                                        |

$$^a R_1 = \Sigma|F_o| - |F_c|/\Sigma|F_o|. \quad ^b wR_2 = \Sigma[w(F_o^2 - F_c^2)^2]/\Sigma[w(F_o^2)^2]^{1/2}$$

**Table S2** Selected bond lengths [Å] and angles [°] for MOFs **1-3**

| <b>1</b>             |            |                       |            |
|----------------------|------------|-----------------------|------------|
| Cu(2)-O(4)           | 1.946(3)   | O(1)- Cu(1)           | 1.955(3)   |
| Cu(2)-O(10)#1        | 1.959(3)   | Cu(1)-O(5)            | 1.956(3)   |
| Cu(2)-O(2)           | 1.951(3)   | Cu(1)-O(9)#1          | 1.990(3)   |
| Cu(2)-O(11)#1        | 1.956(3)   | Cu(1)-O(12)#1         | 1.955(3)   |
| Cu(2)-O(3)           | 2.146(4)   | Cu(3)-O(14)#2         | 1.971(3)   |
| Cu(3)-O(7)           | 1.960(3)   | Cu(3)-N(2)#3          | 2.034(3)   |
| Cu(3)-N(1)#4         | 2.032(3)   | Cu(3)-O(6)            | 2.323(4)   |
| O(4)-Cu(2)-O(10)#1   | 88.24(14)  | O(4)-Cu(2)-O(2)       | 91.21(14)  |
| O(4)-Cu(2)-O(3)      | 99.08(16)  | O(10)#1-Cu(2)-O(3)    | 99.40(15)  |
| O(2)-Cu(2)-O(10)#1   | 169.06(12) | O(2)-Cu(2)-O(3)       | 91.48(15)  |
| O(11)#1-Cu(2)-O(4)   | 166.87(13) | O(11)#1-Cu(2)-O(10)#1 | 90.11(14)  |
| O(11)#1-Cu(2)-O(2)   | 87.95(14)  | O(11)#1-Cu(2)-O(3)    | 94.04(16)  |
| O(5)-Cu(1)-O(1)      | 89.43(13)  | O(5)-Cu(1)-O(9)#1     | 88.69(13)  |
| O(9)#1-Cu(1)-O(1)    | 166.40(12) | O(12)#1-Cu(1)-O(1)    | 88.28(14)  |
| O(12)#1-Cu(1)-O(5)   | 168.57(12) | O(12)#1-Cu(1)-O(9)#1  | 90.91(13)  |
| O(14)#2-Cu(3)-N(2)#3 | 90.95(12)  | O(14)#2-Cu(3)-N(1)#4  | 88.24(12)  |
| O(14)#2-Cu(3)-O(6)   | 88.81(17)  | O(7)-Cu(3)-O(14)#2    | 177.20(11) |
| O(7)-Cu(3)-O(2)#3    | 91.37(12)  | O(7)-Cu(3)-N(1)#4     | 89.67(12)  |
| O(7)-Cu(3)-O(6)      | 89.43(17)  | N(2)#3-Cu(3)-O(6)     | 94.84(15)  |
| N(1)#4-Cu(3)-N(2)#3  | 172.45(13) | N(1)#4-Cu(3)-O(6)     | 92.64(14)  |

Symmetry transformations used to generate equivalent atoms:

#1 1+X, +Y, +Z; #2 +X, -1+Y, +Z; #3 1-X, 1-Y, -Z; #4 1-X, 1-Y, 1-Z #5 +X, 1+Y, +Z; #6 -1+X, +Y, +Z

---

**2**

---

|                     |            |                     |            |
|---------------------|------------|---------------------|------------|
| Cu(1)-O(3)#1        | 1.9354(17) | Cu(1)-O(4)          | 1.9357(18) |
| Cu(1)-O(5)#2        | 2.2741(18) | Cu(1)-N(1)          | 2.030(2)   |
| Cu(1)-N(3)          | 2.046(2)   | O(6)-Cu(3)#3        | 1.9665(17) |
| O(6)-Cu(2)#4        | 1.9676(18) | O(6)-Cu(2)#3        | 2.055(2)   |
| N(2)-Cu(3)          | 2.0182(18) | N(2)-Cu(2)#5        | 2.118(3)   |
| N(2)-Cu(2)          | 2.020(2)   | O(3)#1-Cu(1)-O(4)   | 96.90(7)   |
| O(3)#1-Cu(1)-O(5)#2 | 110.94(7)  | O(3)#1-Cu(1)-N(1)   | 90.24(7)   |
| O(3)#1-Cu(1)-N(3)   | 163.27(7)  | O(4)-Cu(1)-O(5)#2   | 94.01(7)   |
| O(4)-Cu(1)-N(1)     | 171.44(7)  | O(4)-Cu(1)-N(3)     | 90.98(7)   |
| N(1)-Cu(1)-O(5)#2   | 87.79(7)   | N(1)-Cu(1)-N(3)     | 80.92(7)   |
| N(3)-Cu(1)-O(5)#2   | 83.06(7)   | O(6)#5-Cu(3)-O(6)#7 | 180.0      |
| O(6)#7-Cu(3)-N(2)#6 | 89.14(7)   | O(6)#5-Cu(3)-N(2)#6 | 90.86(7)   |
| O(6)#5-Cu(3)-N(2)   | 89.14(7)   | N(2)#6-Cu(3)-N(2)   | 180.0      |
| O(6)#5-Cu(2)-O(6)#7 | 160.8(3)   | O(6)#5-Cu(2)-N(2)   | 91.46(8)   |
| O(6)#5-Cu(2)-N(2)#6 | 88.84(9)   | O(6)#7-Cu(2)-N(2)#6 | 84.14(11)  |
| N(2)-Cu(2)-N(2)#6   | 161.4(31)  |                     |            |

---

Symmetry transformations used to generate equivalent atoms:

#1 -1+X, +Y, +Z; #2 1-X, 1-Y, 1-Z; #3 +X, 1+Y, +Z; #4 1+X, +Y, +Z; #5 1-X, 1-Y, 2-Z; #6 X, -1+Y, Z;

#7 1-X, -Y, 2-Z

---

**3**

---

|                       |            |                        |            |
|-----------------------|------------|------------------------|------------|
| Cu(1)-O(12)           | 1.9200(18) | O(1)-Cu(12) #1         | 2.368(2)   |
| Cu(1)-O(19)#2         | 1.9693(18) | Cu(1)-O(15) #3         | 1.9959(18) |
| Cu(1)-O(17) #4        | 1.9739(18) | Cu(3)-O(10)            | 1.943(2)   |
| Cu(3)-O(6)            | 1.945(2)   | Cu(3)-N(2)             | 2.000(2)   |
| Cu(3)-N(3)            | 1.977(2)   | O(9)-Cu(4)#5           | 1.938(2)   |
| Cu(2)-O(14) #6        | 1.9699(18) | Cu(2)-O(11)            | 1.9454(18) |
| Cu(2)-O(12)           | 1.8839(18) | Cu(2)-O(16) #4         | 1.9546(18) |
| Cu(4)-O(2)            | 1.955(3)   | Cu(4)-O(5)             | 1.976(2)   |
| Cu(4)-O(3)            | 2.222(3)   | Cu(4)-O(4)             | 1.948(2)   |
| O(12)-Cu(1)-O(12)#1   | 84.15(8)   | O(12)-Cu(1)-O(19)#2    | 92.00(8)   |
| O(12)-Cu(1)-O(15)#3   | 173.23(9)  | O(12) -Cu(1)-O(17)#4   | 92.69(8)   |
| O(19)#2-Cu(1)-O(12)#1 | 89.58(9)   | O(19)#2-Cu(1)-O(15) #3 | 91.80(8)   |
| O(15)#3-Cu(1)-O(12)#1 | 90.27(8)   | O(17)#4-Cu(1)-O(12)#1  | 95.21(9)   |
| O(17)#4-Cu(1)-O(19)#2 | 173.61(10) | O(17)#4-Cu(1)-O(15)#3  | 83.98(8)   |
| O(10)-Cu(3)-O(6)      | 172.30(8)  | O(10)-Cu(3)-N(2)       | 90.89(9)   |
| O(10)-Cu(3)-N(3)      | 93.55(10)  | O(6)-Cu(3)-N(2)        | 91.55(9)   |
| O(6)-Cu(3)-N(3)       | 87.06(10)  | O(11)-Cu(2)-O(14)#6    | 92.55(8)   |
| O(11)-Cu(2)-O(16)#4   | 83.69(8)   | O(12)-Cu(2)-O(14)#6    | 88.48(8)   |
| O(12)-Cu(2)-O(11)     | 178.90(9)  | O(12)-Cu(2)-O(16)#4    | 95.32(8)   |
| O(16)#4-Cu(2)-O(14)#6 | 174.11(9)  | O(9)#5-Cu(4)-O(2)      | 92.80(11)  |
| O(9)#5-Cu(4)-O(5)     | 84.80(9)   | O(9)#5-Cu(4)-O(3)      | 92.73(15)  |
| O(9)#5-Cu(4)-O(4)     | 167.74(13) | O(2)-Cu(4)-O(5)        | 171.37(15) |
| O(2)-Cu(4)-O(3)       | 102.88(17) | O(5)-Cu(4)-O(3)        | 85.54(11)  |
| O(4)-Cu(4)-O(2)       | 89.67(12)  | O(4)-Cu(4)-O(5)        | 90.99(10)  |
| O(4)-Cu(4)-O(3)       | 98.43(15)  |                        |            |

---

Symmetry transformations used to generate equivalent atoms:

#1 1.5-X, 0.5+Y, 0.5-Z; #2 X, 1-Y, -0.5+Z; #3 +X, +Y, -1+Z; #4 1.5-X, 1.5-Y, -Z; #5 1-X, +Y, 1.5-Z;

#6 1.5-X, 1.5-Y, 1-Z; #7 1-X, Y, 0.5-Z; #8 +X,+Y,1+Z; #9 +X,1-Y, 0.5+Z; #10 1.5-X, -0.5+Y, 0.5-Z

Table S3 Mild oxidation of cycloalkanes (C6 and C8) in the presence of catalysts **1-3**<sup>a</sup>

|             |             | 20 °C          |               |                    | 40 °C          |               |                    | 60 °C          |               |                    |
|-------------|-------------|----------------|---------------|--------------------|----------------|---------------|--------------------|----------------|---------------|--------------------|
| hydrocarbon |             | Cyclic alcohol | Cyclic ketone | total <sup>c</sup> | Cyclic alcohol | Cyclic ketone | total <sup>c</sup> | Cyclic alcohol | Cyclic ketone | total <sup>c</sup> |
| <b>1</b>    | cyclohexane | 0.05           | 0.27          | 0.31               | 8.04           | 6.21          | 14.25              | 11.08          | 8.63          | 19.71              |
|             | cyclooctane | trace          | 0.89          | 0.89               | 1.07           | 5.25          | 6.32               | 1.14           | 4.33          | 5.47               |
| <b>2</b>    | cyclohexane | trace          | 0.66          | 0.66               | 10.07          | 11.16         | 21.23              | 13.06          | 12.25         | 25.31              |
|             | cyclooctane | trace          | 1.05          | 1.05               | 1.90           | 7.09          | 8.99               | 3.08           | 7.26          | 10.34              |
| <b>3</b>    | cyclohexane | trace          | 1.23          | 1.23               | 11.21          | 7.09          | 18.30              | 14.72          | 11.24         | 25.96              |
|             | cyclooctane | trace          | 0.21          | 0.21               | 3.12           | 8.53          | 11.65              | 2.04           | 7.04          | 9.08               |

<sup>a</sup>Conditions of the reactions: cycloalkane, 1 mmol; catalysts **1-3**, 10 μmol; H<sub>2</sub>O<sub>2</sub>, 5 mmol; MeCN, 2.5 mL; time, 6 h. <sup>b</sup>Yields were calculated as (moles of product per mole of cycloalkane) × 100% ; typically determined by GC after the treatment with PPh<sub>3</sub>. <sup>c</sup>Sum of the alcohol and ketone yields.

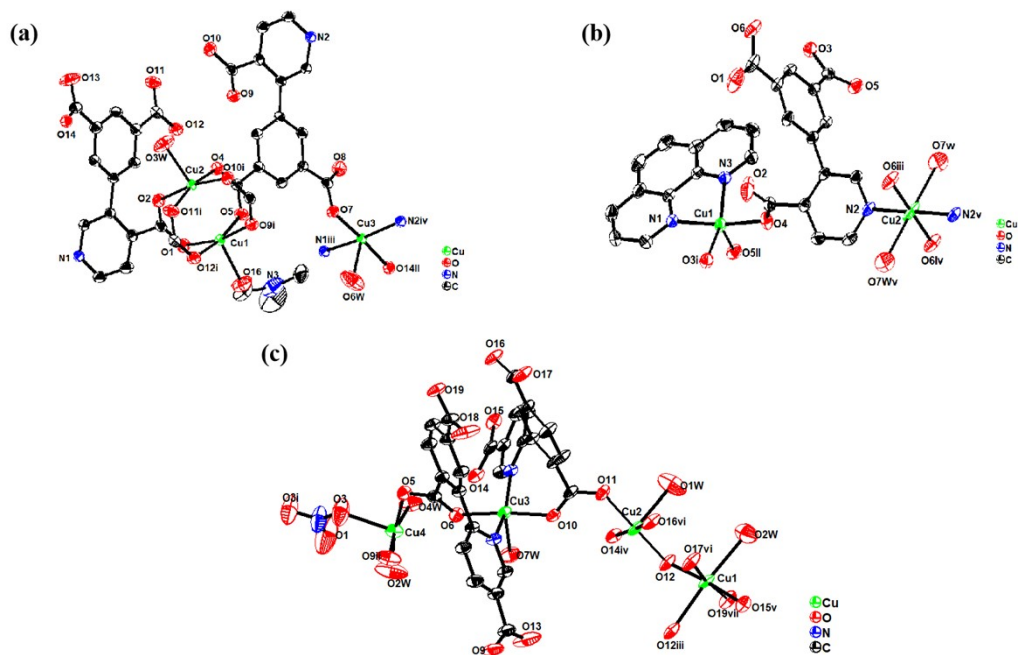

**Fig. S24** The ORTEP diagrams of MOF **1** (a), **2** (b), **3** (c) (probability level 50%). Symmetry equivalent positions are (i)  $1+x, y, z$ ; (ii)  $x, -1+y, z$ ; (iii)  $1-x, 1-y, 1-z$ ; (iv)  $1-x, 1-y, -z$  for MOF **1**; (i)  $-1+x, y, z$ ; (ii)  $1-x, 1-y, 1-z$ ; (iii)  $1-x, 1-y, 2-z$ ; (iv)  $x, -1+y, z$  for MOF **2**; (i)  $1-x, y, 1.5-z$ ; (ii)  $1-x, y, 0.5-z$ ; (iii)  $1.5-x, 1.5-y, -z$ ; (iv)  $1.5-x, 1-y, 1-z$ ; (v)  $x, y, -1+z$ ; (vi)  $x, 1-y, -0.5+z$  for MOF **3**.
